# Supplementary material for: Integrating Nutrition into Outpatient Oncology Care—A Pilot Trial of the NutriCare Program
Source: PubMed Central journal article supplement (PMC7700247; doi:10.3390/nu12113590), 2020-11-23
Supplement: nutrients-12-03590-s001.pdf [file nutrients-12-03590-s001.pdf]

Supplementary Table 1: Additional participant characteristics

|                                | <b>N(%) or Mean (SD)</b> |
|--------------------------------|--------------------------|
| <b>Diabetes Mellitus, n(%)</b> |                          |
| Yes                            | 1 (5)                    |
| No                             | 19 (95)                  |
| <b>Hypertension, n(%)</b>      |                          |
| Yes                            | 5 (25)                   |
| No                             | 15 (75)                  |
| <b>Dyslipidemia, n(%)</b>      |                          |
| Yes                            | 3 (15)                   |
| No                             | 17 (85)                  |
| <b>Income, n(%)</b>            |                          |
| <\$40,000                      | 0 (0)                    |
| \$40,000-\$59,000              | 4 (20)                   |
| \$60,000-\$79,000              | 0 (0)                    |
| \$80,000+                      | 11 (55)                  |
| Not specified                  | 5 (25)                   |
| <b>Marital Status, n(%)</b>    |                          |
| Married                        | 9 (45)                   |
| Divorced                       | 2 (10)                   |
| Widowed                        | 3 (15)                   |
| Unmarried                      | 6 (30)                   |
| <b>Living Situation, n(%)</b>  |                          |
| Lives alone                    | 3 (15)                   |
| Lives with others              | 17 (85)                  |
| <b>Employment, n(%)</b>        |                          |
| Full time                      | 13 (65)                  |
| Part time                      | 1 (5)                    |
| Self employed                  | 1 (5)                    |
| Unemployed                     | 1 (5)                    |
| Student                        | 1 (5)                    |
| Retired                        | 3 (15)                   |
| <b>Insurance, n(%)</b>         |                          |
| Private                        | 15 (75)                  |
| Public                         | 1 (5)                    |
| Private and Public             | 3 (15)                   |
| Other                          | 1 (5)                    |

**Supplementary Table 2:** Results of the NACP questionnaire (n=20), at baseline

| <b>Dietary Intake</b>                                                                                |                               |                           |                              |                                |
|------------------------------------------------------------------------------------------------------|-------------------------------|---------------------------|------------------------------|--------------------------------|
| <b>In an average week, how often do you</b>                                                          | <b>Usually/often<br/>n(%)</b> | <b>Sometimes<br/>n(%)</b> | <b>Rarely/never<br/>n(%)</b> | <b>Not applicable<br/>n(%)</b> |
| <i>eat less than 2 servings of fruit per day</i>                                                     | 4 (20)                        | 9 (45)                    | 7 (35)                       | 0 (0)                          |
| <i>eat less than 2.5 servings of vegetables per day</i>                                              | 3 (15)                        | 8 (40)                    | 9 (45)                       | 0 (0)                          |
| <i>eat less than 3 servings of wholegrains per day</i>                                               | 7 (35)                        | 10 (50)                   | 3 (15)                       | 0 (0)                          |
| <i>eat or drink less than 3 servings of milk, yogurt or cheese per day</i>                           | 7 (35)                        | 10 (50)                   | 3 (15)                       | 0 (0)                          |
| <i>eat more than 6 servings of cooked red meat a week</i>                                            | 0 (0)                         | 5 (25)                    | 12 (60)                      | 3 (15)                         |
| <i>eat any processed meats</i>                                                                       | 1 (5)                         | 5 (25)                    | 11 (55)                      | 3 (15)                         |
| <i>eat less than 4 servings of nuts/seeds per week</i>                                               | 8 (40)                        | 3 (15)                    | 9 (45)                       | 0 (0)                          |
| <i>drink 16 ounces or more of non-diet soda, fruit drink/punch or Kool-Aid per day</i>               | 0 (0)                         | 1 (5)                     | 12 (60)                      | 7 (35)                         |
| <i>drink more than 1 alcohol drink per day (women) or more than 2 alcoholic drinks per day (men)</i> | 0 (0)                         | 6 (30)                    | 9 (45)                       | 5 (25)                         |
| <i>eat 4 or more meals from takeout restaurants in a week</i>                                        | 0 (0)                         | 4 (20)                    | 13 (65)                      | 3 (15)                         |
| <b>Motivation</b>                                                                                    |                               |                           |                              |                                |
| <i>How willing are you to make changes in your eating habits in order to be healthier?</i>           |                               |                           |                              |                                |
| <b>Not willing at all</b>                                                                            |                               |                           |                              | <b>Very willing</b>            |
| 0 (0)                                                                                                | 1 (5)                         | 0 (0)                     | 3 (15)                       | 16 (80)                        |
